# Supplementary material for: Leucine supplementation during caloric restriction in adults at risk of metabolic syndrome: An 8 week double blind randomized controlled trial
Source: Research Square preprint supplement (doi:10.21203/rs.3.rs-2319322/v1), 2023-01-17
Supplement: Supplementary file 1 [file 0c0d78e00eb3c64f739083a5.xlsx]

## Sheet: Sheet1
Table3: Effect of Leucine supplementation on metabolic parameters following 8 weeks of a calorie restricted diet.
Variables	Placebo (n= 19)		Leucine (n=18)		ANCOVA#
(measured at end)	Mean (std.error)		Mean (std.error)		Treatment effect	Gender effect	Treatment * Gender interaction	Phase effect	Treatment * Phase interaction
		95% CI		95% CI
Fasting glucose (mmol/L)	5.2 (0.11)	(5.06, 5.48)	5.5 (0.15)	(5.22, 5.76)	NS	NS	NS	NS	NS
Post prandial glucose (mmol/L)	6.6 (0.33)	(5.95, 7.24)	6.8 (0.40)	(6.06, 7.61)	NS	NS	NS	NS	NS
Fasting insulin (mU/L)	8.2 (1.12)	(6.19, 10.66)	8.3 (0.10)	(6.46, 10.42)	NS	NS	NS	NS	NS
2h PP insulin (mU/L)	39.1 (5.65)	(28.82, 50.99)	42.8 (6.24)	(31.26, 55.73)	NS	NS	NS	P=0.025	NS
McAuleys	8.1 (0.44)	(7.24, 8.96)	7.9 (0.43)	(7.03, 8.75)	NS	NS	NS	NS	NS
Fasting ISI, (Stumvoll)	20.8 (3.31)	(15.16, 28.29)	18.2 (2.64)	(13.75, 24.16)	NS	NS	NS	NS	NS
2h PP ISI (Stumvoll)	3.2 (0.54)	(2.20, 4.32)	3.7 (0.62)	(2.52, 5.00)	NS	NS	NS	P=0.041	NS
MetS Component	2.3 (0.16)	(1.98, 2.64)	2.2 (0.18)	(1.86, 2.59)	NS	NS	NS	NS	P=0.037
#Variables included: treatment, age, gender, phase, change in FM and change in FFM, change in WC, treatment*gender, and treatment*phase (an interaction term was removed if it was non-significant), adjusting for baseline values.
