# Supplementary material for: Leucine supplementation during caloric restriction in adults at risk of metabolic syndrome: An 8 week double blind randomized controlled trial
Source: Research Square preprint supplement (doi:10.21203/rs.3.rs-2319322/v1), 2023-01-17
Supplement: Supplementary file 2 [file 2810ab0c37f4c5b136713e12.xlsx]

## Sheet: Sheet1
	Table 1: Baseline anthropometric and metabolic characteristics for all participants
	Variables	Placebo (n=19)	Leucine (n=18)	P* value
		Mean ± SD	Mean ± SD
	Age (yrs)	46.5 ± 14.59	51.3 ± 14.79	0.326
	Gender (M/F)	7M/ 12F	5M/ 13F	0.556a
	Weight (kg)	92.5 ± 19.42	94.0 ± 21.43	0.826
	Fat mass (kg)	38.1 ± 11.55	41.8 ± 11.76	0.349
	Fat free mass (kg)	54.4 ± 13.00	52.2 ± 13.86	0.63
	Fat %	41.3 ± 9.89	45.1 ± 6.96	0.191
	Lean tissue mass (kg)	51.5 ± 12.55	49.5 ± 13.41	0.634
	Appendicular Mass (kg)	23.2 ± 5.51	21.0 ± 5.10	0.204
	Non- appendicular mass (kg)	28.3 ± 7.22	28.5 ± 9.49	0.939
	Waist circumference (cm)	103.0 ± 14.75	106.0 ± 15.57	0.546
	Stumvoll ISI (fasting)	14.03 ± 6.14	16.0 ± 7.82	0.402
	Fasting Glucose (mmol/l)	5.5 ± 0.63	5.5 ± 0.97	0.765
	Fasting Insulin (mU/L)	9.57 ± 6.302	8.13 ± 4.332	0.426
	Number of MetS components	2.4 ± 1.065	2.9 ± 1.305	0.149
	Prescribed Calorie Deficit (kJ/d)	-2387 ± 616.1	-2336 ± 612.1	0.94
	ISI: insulin sensitivity index; SD: standard deviation
	*P value: Independent samples t-test
	aChi Square test for categorical variables; P<0.05 – Significant
