# Supplementary material for: Leucine supplementation during caloric restriction in adults at risk of metabolic syndrome: An 8 week double blind randomized controlled trial
Source: Research Square preprint supplement (doi:10.21203/rs.3.rs-2319322/v1), 2023-01-17
Supplement: Supplementary file 3 [file e0831bf472ca98a708e85f12.xlsx]

## Sheet: Sheet1
Table 2. Effects of Leucine supplementation on anthropometry and body composition following 8 weeks of a calorie restricted diet.
	Placebo (n= 19)		Leucine (n=18)		ANCOVA#
Variable
(measured at end)	Mean (std.error)		Mean (std.error)		Treatment effect	Gender effect	Treatment * Gender interaction	Phase effect	Treatment * Phase interaction
		95% CI		95% CI
Weight (kg)	88.8 (3.66)	(81.66, 96.24)	89.5 (3.63)	(82.49, 97.26)	NS	NS	NS	NS	NS
WC (cm)	99.6 (2.96)	(93.85,105.56)	99.4 (2.70)	(94.06,105.03)	NS	NS	NS	P=0.021	NS
% Fat mass	40.4 (1.51)	(37.49, 43.25)	41.4 (1.41)	(38.86, 44.24)	NS	P = 0.030	NS	NS	NS
Fat Mass (kg)	36.5 (2.26)	(32.33, 41.15)	36.7 (2.10)	(32.46, 41.02)	NS	NS	NS	NS	NS
Fat free mass (kg)	52.0 (2.19)	(47.85, 56.70)	53.0 (2.13)	(49.05, 57.40)	P=0.045	NS	P=0.040	NS	NS
Lean Mass (kg)	49.2 (2.10)	(45.29, 53.72)	50.2 (2.05)	(46.43, 54.45)	P=0.050	NS	P=0.045	NS	NS
AG ratio	1.1 (0.04)	(1.01, 1.16)	1.1 (0.04)	(1.04, 1.21)	NS	NS	NS	NS	NS
Appendicular mass(kg)	22.3 (0.84)	(20.62, 24.02)	22.4 (0.76)	(20.91, 23.93)	NS	NS	NS	NS	NS
Non-appendicular mass (kg)	27.42 (1.38)	(25.05, 30.57)	27.63 (1.46)	(24.92, 30.74)	NS	NS	P=0.023	NS	NS
